# Supplementary material
Source: PubMed Central journal article supplement (PMC5641872)
Supplement: 10.1074_M117.785576_jbc.M117.785576-1.pdf [file 10.1074_M117.785576_jbc.M117.785576-1.pdf]

Supplementary Information for:

**Efficient reduction of CO<sub>2</sub> by the molybdenum-containing formate dehydrogenase from *Cupriavidus necator* (*Ralstonia eutropha*).**

by

Xuejun Yu, Dimitri Niks, Ashok Mulchandania, and Russ Hille

## Supplementary Information

Figure S1

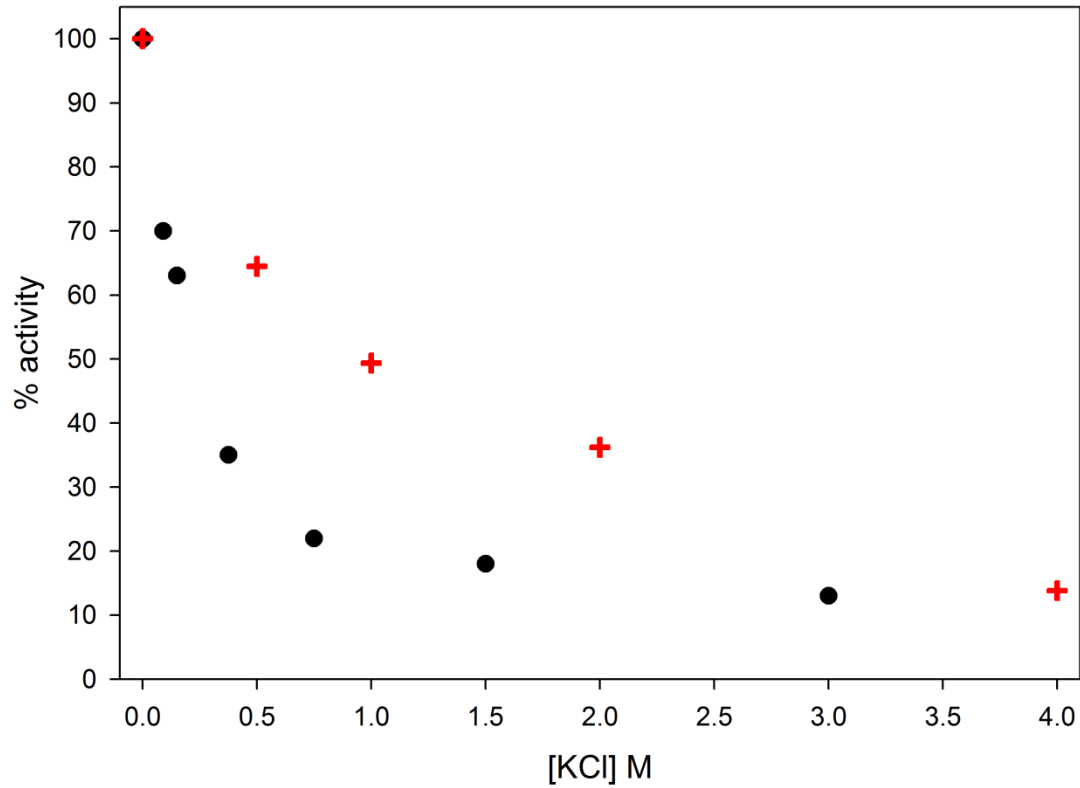

**Figure S1.** Effect of KCl concentration on the reaction of FdsABG with saturated CO<sub>2</sub> and 200 μM NADH (black circles) or 40 mM formate and 2 mM NAD<sup>+</sup> (red crosses). All reactions were performed in 100 mM K-PO<sub>4</sub> at pH 7.0 at 30°C.

**Figure S2**

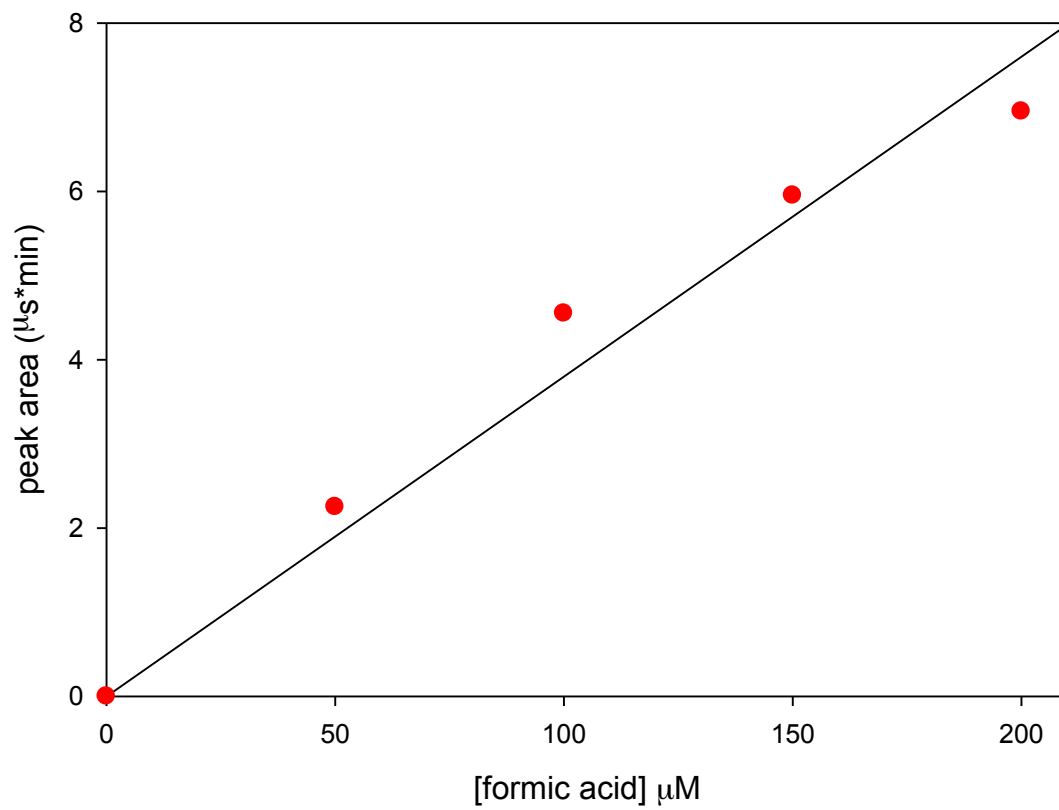

**Figure S2.** Calibration standard curve (with slope = 0.038) for formic acid using Ion Chromatography.

**Figure S3**

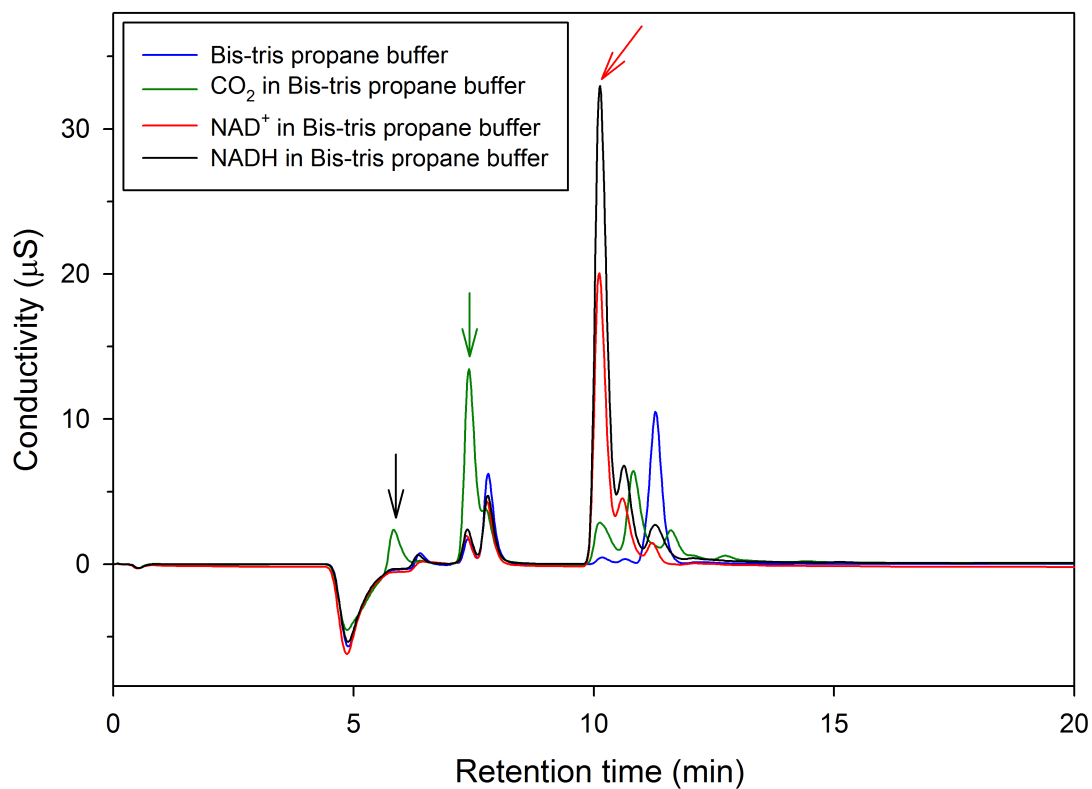

**Figure S3.** Ion chromatography analysis of 20 mM Bis-Tris propane buffer (blue), 20 mM Bis-Tris propane buffer saturated with CO<sub>2</sub> (green), 300 mM NAD<sup>+</sup> in 20 mM Bis-Tris propane buffer (red), and 300 mM NADH in 20 mM Bis-Tris propane buffer (black). Retention times are indicated for bicarbonate/carbonate at 7.4 min (green arrow) and NAD<sup>+</sup>/NADH at 11.2 min (red arrow); a small peak is present near the 5.9 min retention time for formic acid (black arrow).
